# Supplementary material for: Flavonoid Metabolites in Serum and Urine after the Ingestion of Selected Tropical Fruits
Source: MDPI journal article supplement (doi:10.3390/nu16010161), 2024-01-04
Supplement: s1 [file s1]

## Supplementary Data

**Table S1** Demographic, biochemical and hematological profile of participants

| Parameter                   | Group I<br>(Pineapple) | Group II<br>(Guava) | Group III<br>(Pomelo) |
|-----------------------------|------------------------|---------------------|-----------------------|
| n                           | 6                      | 6                   | 6                     |
| Gender (M/F)                | 6/0                    | 5/1                 | 5/1                   |
| Age (years)                 | 24.5 (21-29)           | 25 (21-29)          | 24.5 (21-29)          |
| BMI (kg/m <sup>2</sup> )    | 22.1 (20.7-23.1)       | 22.0 (20.9-23.1)    | 22.0 (20.5-23.1)      |
| ALP (U/L)                   | 88 (79-100)            | 88 (71-98)          | 90 (71-105)           |
| AST (U/L)                   | 16.5 (12-22)           | 21.5 (16-27)        | 21 (15-27)            |
| ALT (U/L)                   | 35 (22-44)             | 36 (34-56)          | 37.5 (32-56)          |
| GGT (U/L)                   | 31 (38-41)             | 35 (25-40)          | 36 (25-41)            |
| Albumin (g/L)               | 43.15 (41.1-44.3)      | 45.75 (40-47.8)     | 43.1 (40-47.7)        |
| BUN (mg/dL)                 | 9.5 (7-11)             | 12.5 (11-17)        | 12.5 (9-17)           |
| Creatinine (mg/dL)          | 0.78 (0.64-0.99)       | 0.83 (0.8-1.07)     | 0.83 (0.7-1.07)       |
| Triglyceride (mg/dL)        | 70.5 (51-96)           | 81 (48-147)         | 64.5 (48-137)         |
| Cholesterol (mg/dL)         | 189 (153-201)          | 199 (159-216)       | 198 (180-213)         |
| Total bilirubin<br>(mg/dL)  | 0.5 (0.4-0.7)          | 0.5 (0.2-0.7)       | 0.6 (0.2-0.9)         |
| WBC (x 10 <sup>3</sup> /μL) | 5.9 (5.4-6.9)          | 6.4 (4.7-8.9)       | 6.7 (4.7-8.9)         |
| RBC (x 10 <sup>6</sup> /μL) | 5.3 (4.8-6.0)          | 5.2 (4.6-5.9)       | 5.3 (4.6-5.6)         |
| Hb (g/dL)                   | 14.2 (12.3-16.6)       | 14.4 (12.4-16.0)    | 14.4 (12.3-16.0)      |
| HCT (%)                     | 42.8 (36.7-49.8)       | 44.0 (37.7-48.8)    | 44.0 (37.7-48.3)      |
| MCV (fL)                    | 86.4 (80.6-89.8)       | 85.5 (81.6-9.12)    | 86.7 (81.6-89.8)      |
| MCHC (g/dL)                 | 33.4 (33.3-34.6)       | 34.1 (33.0-34.9)    | 34.2 (33.0-34.9)      |
| PLT (x 10 <sup>3</sup> /μL) | 268 (223-312)          | 268 (218-384)       | 334 (264-384)         |
| MPV (fL)                    | 10.0 (9.5-11.0)        | 9.20 (8.6-10.0)     | 9.05 (8.5-10.0)       |

Data are presented as median (Min-Max)

APL, alkaline phosphatase; AST, aspartate aminotransferase; ALT, alanine aminotransferase; GGT, gamma-glutamyltranpeptidase; BUN, blood urea nitrogen; WBC, white blood cell count; RBC, red blood cell count; Hb, hemoglobin, HCT, hematocrit; MCV, mean corpuscular volume; MCHC, mean corpuscular hemoglobin concentration

**Table S2** Levels of blood glucose before and 4 hours after fruits ingestion

| <b>Group</b>        | <b>Blood glucose levels (mg/dL)</b> |                                |
|---------------------|-------------------------------------|--------------------------------|
|                     | <b>Before ingestion</b>             | <b>4 Hours after ingestion</b> |
| Group I (Pineapple) | 90.5 (84-97)                        | 86.5 (77-98)                   |
| Group II (Guava)    | 79.5 (73-86)                        | 78.5 (72-84)                   |
| Group III (Pomelo)  | 79.5 (73-97)                        | 76.5 (70-79)                   |

Data are presented as median (Min-Max). Normal blood glucose level is 70-110 mg/dL.

**Figure S1** Mass spectrum of flavonoids and product ions after fragmentation

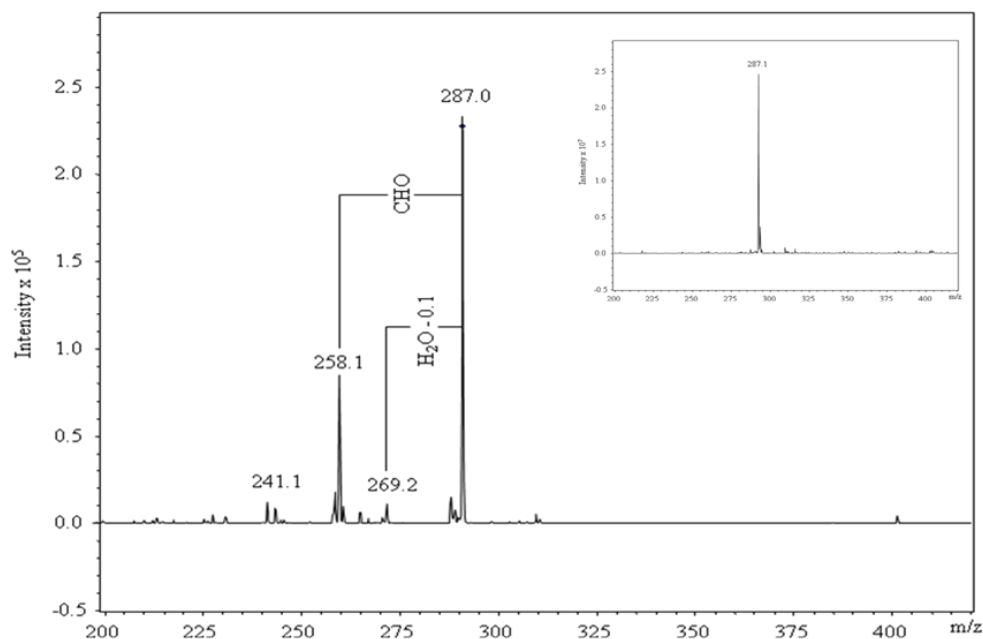

**Figure S1.1** Mass spectrum of **luteolin**,  $m/z$  287  $[M+H]^+$  by direct infusion of standard solution (insert) and product ions after fragmentation by applied energy 1.20 volts at  $m/z$  287

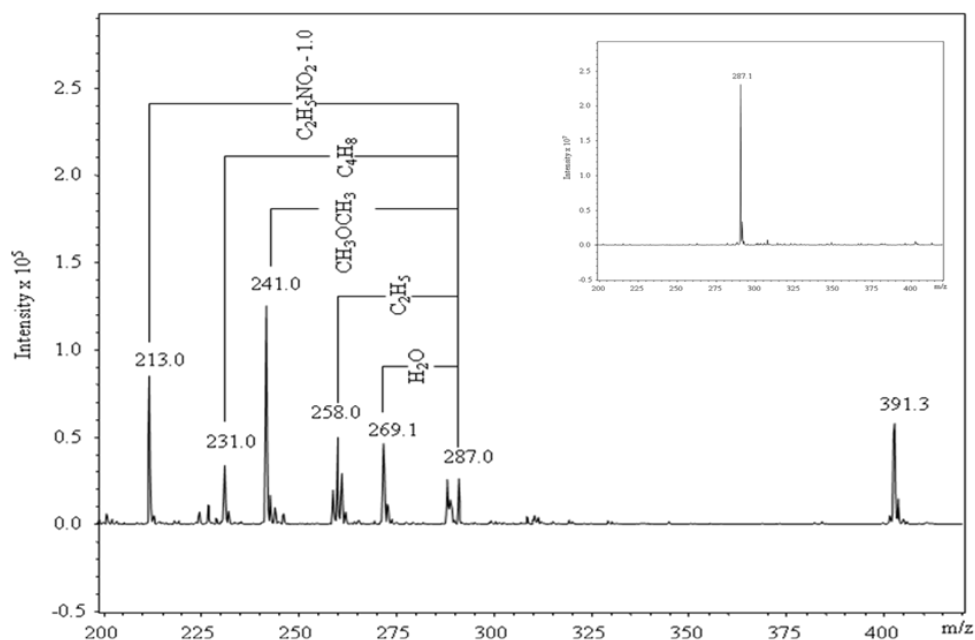

**Figure S1.2** Mass spectrum of **kaempferol**,  $m/z$  287  $[M+H]^+$  by direct infusion of standard solution (insert) and product ions after fragmentation by applied energy 1.30 volts at  $m/z$  287

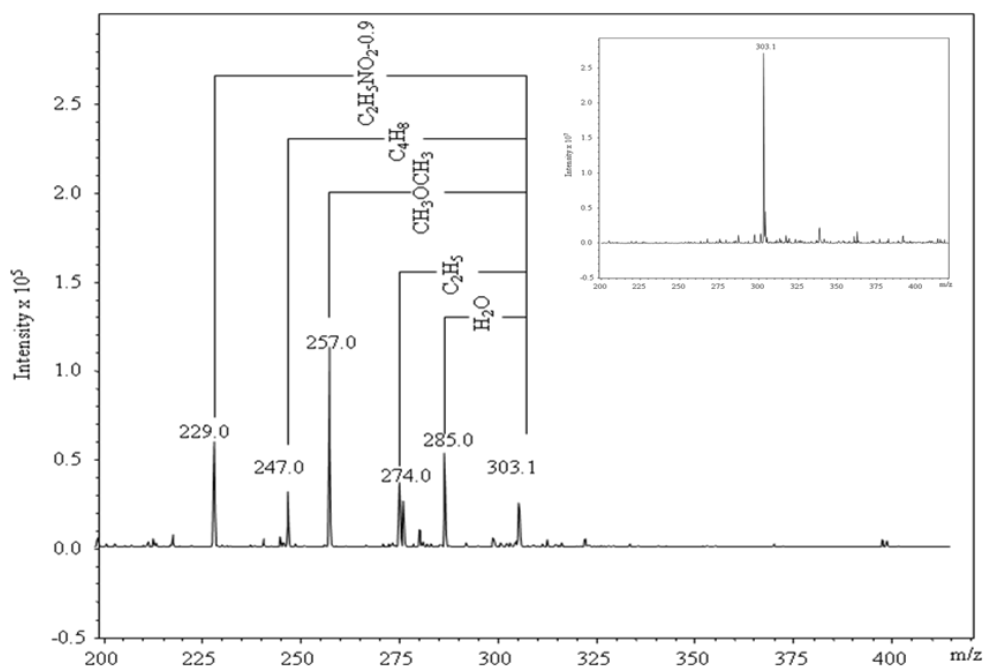

**Figure S1.3** Mass spectrum of **quercetin**,  $m/z$  303  $[M+H]^+$  by direct infusion of standard solution (insert) and product ions after fragmentation by applied energy 1.35 volts at  $m/z$  303

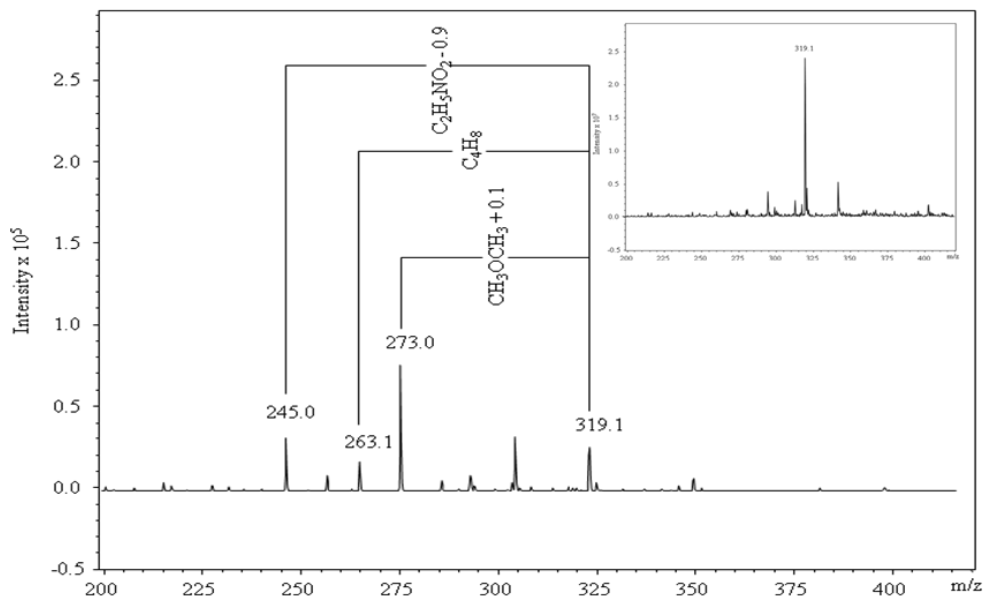

**Figure S1.4** Mass spectrum of **myricetin**,  $m/z$  319  $[M+H]^+$  by direct infusion of standard solution (insert) and product ions after fragmentation by applied energy 1.30 volts at  $m/z$  319.

**Figure S2** Mass chromatogram of flavonoids and their product ions after fragmentation

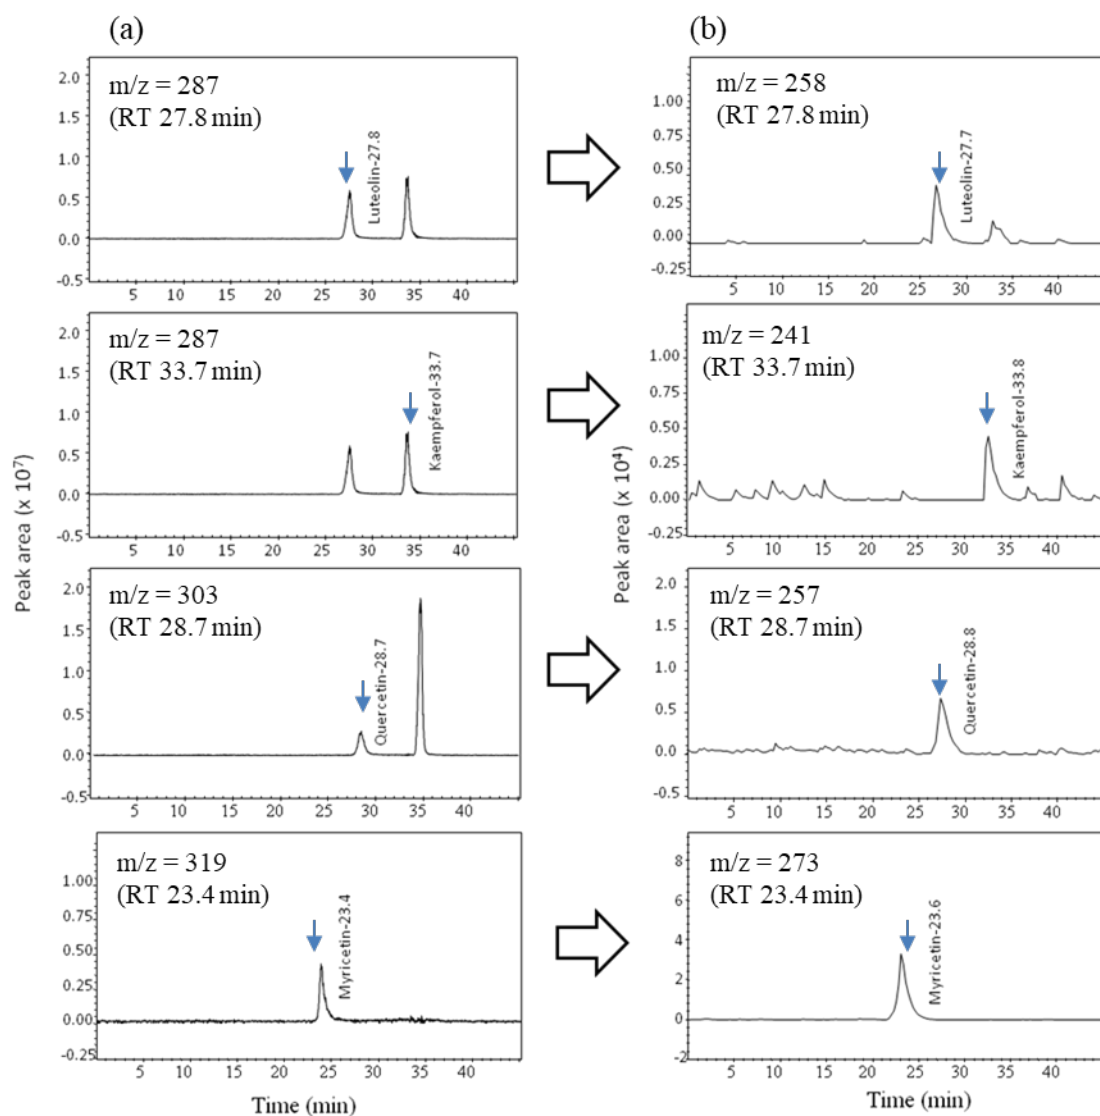

**Figure S2** Mass chromatogram of luteolin ( $m/z = 287$ ), kaempferol ( $m/z = 287$ ), quercetin ( $m/z = 303$ ), and myricetin ( $m/z = 319$ ) at concentration  $1 \mu\text{g/mL}$  (a), and their respective product ions after fragmentation (b).
